# Supplementary material for: Impact of the X Chromosome and sex on regulatory variation
Source: HighWire-hosted journal article supplement (doi:10.1101/gr.197897.115), 2016-04-21
Supplement: Supplemental_Fig_S3.pdf [file Supplemental_Fig_S3.pdf]

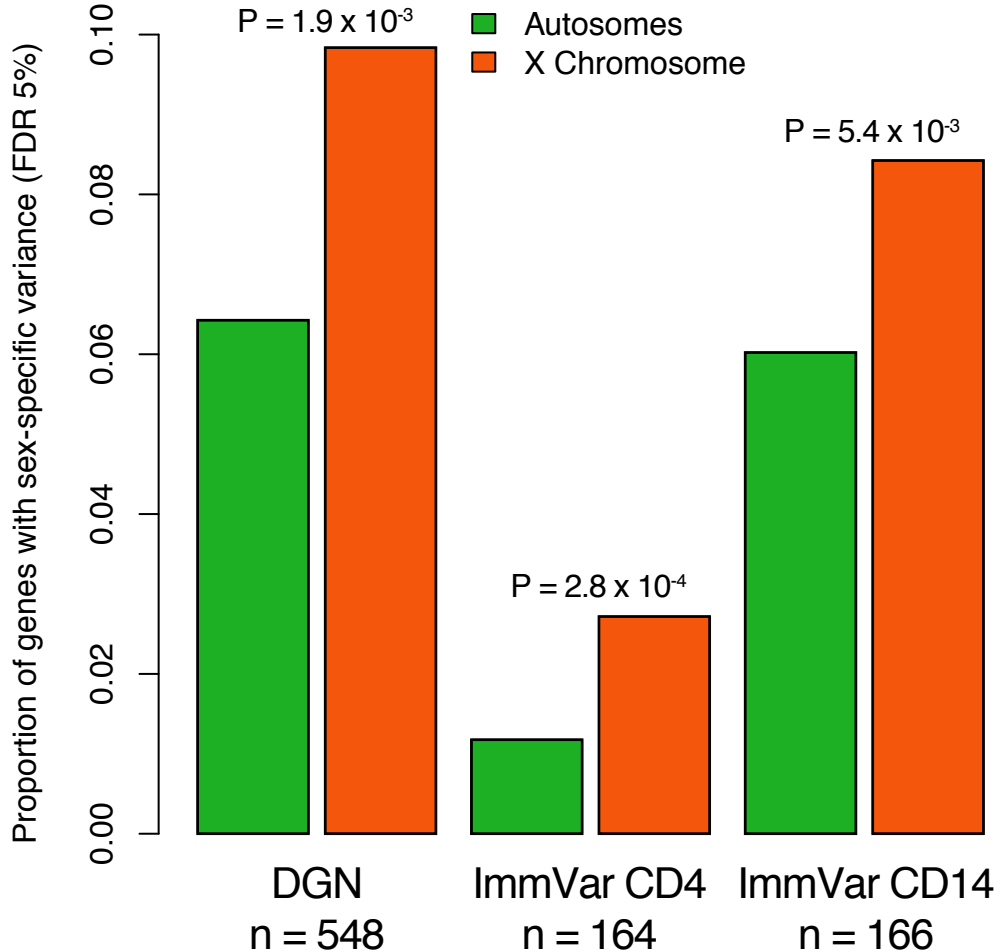

**Figure S3. Replication of differential expression variance between the sexes.**

Comparison of genes with significant sex-specific expression variance (FDR 5%) on the autosomes and the X Chromosome in the DGN and ImmVar cohorts. To test for differences in expression variance, the number of males and females were matched and only genes with baseline expression in both males and females were tested (see Methods). Fisher's exact test P-values above bars indicates significance of higher expression variance on X Chromosome relative to autosomes.
