# Supplementary material for: Impact of the X Chromosome and sex on regulatory variation
Source: HighWire-hosted journal article supplement (doi:10.1101/gr.197897.115), 2016-04-21
Supplement: Supplemental_Fig_S4.pdf [file Supplemental_Fig_S4.pdf]

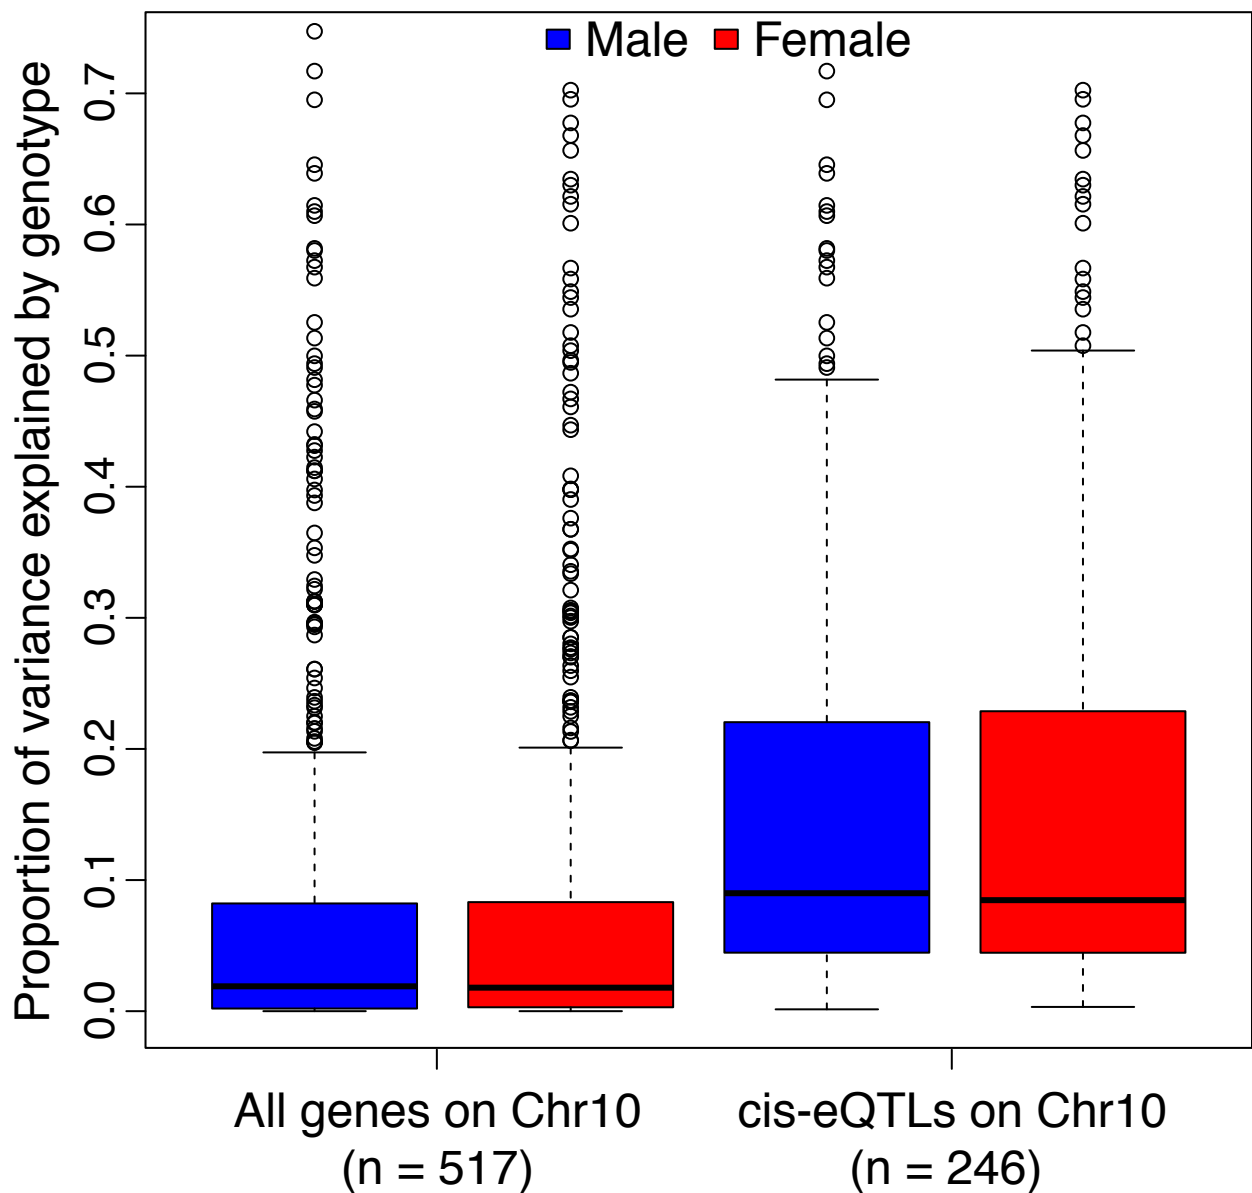

**Figure S4. Proportion of variance explained by genotype on Chr10.**  
Proportion of variance explained (PVE) by genotype on chromosome 10 (chr10) in males and females. To test for the PVE, the number of males and females were matched (n = 274). We tested all genes on chr10 and genes with a cis-eQTL (Bonferroni adjusted P- value < 0.05). Unlike on the X Chromosome, there is no significant difference in the PVE for males and females for all genes (Wilcoxon-rank-sum P-value = 0.557) and all cis- eQTL genes (Wilcoxon-rank-sum P-value = 0.686).
