# Supplementary material for: Impact of the X Chromosome and sex on regulatory variation
Source: HighWire-hosted journal article supplement (doi:10.1101/gr.197897.115), 2016-04-21
Supplement: Supplemental_Fig_S5.pdf [file Supplemental_Fig_S5.pdf]

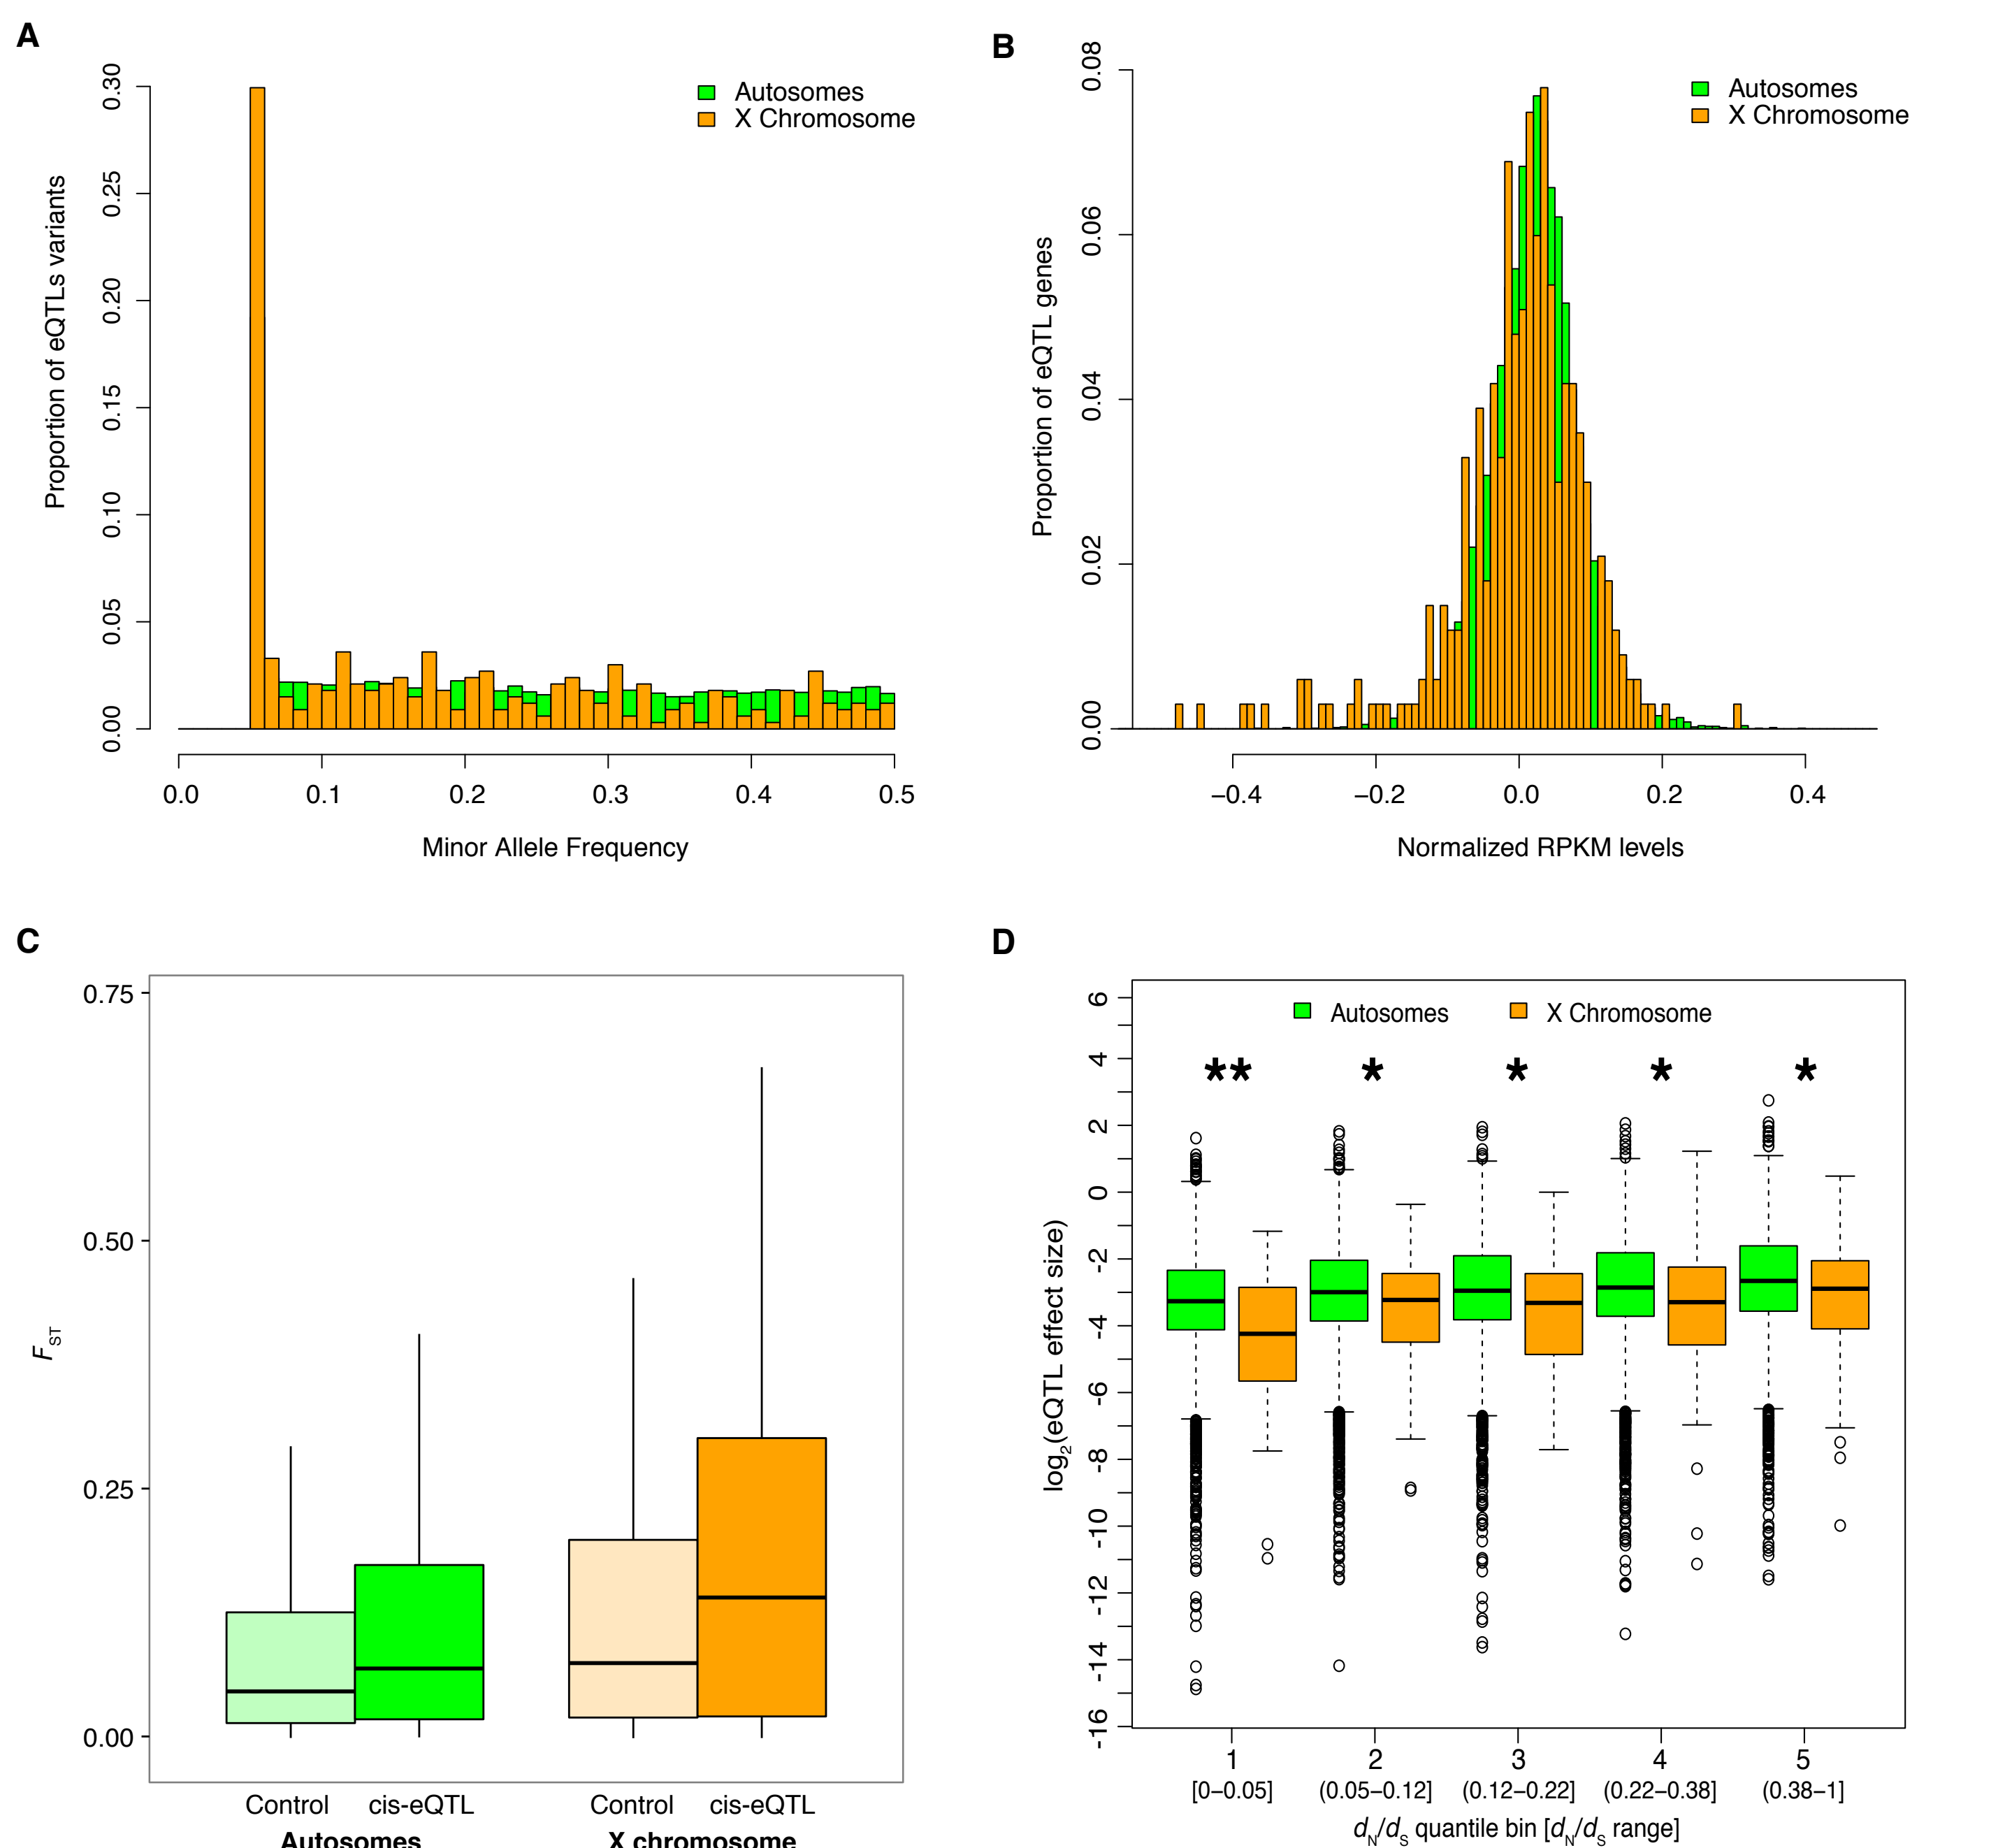

**Figure S5. Relationship of MAF and dN/dS with eQTLs.**  
**A.** Histogram illustrating the distribution of minor allele frequencies (MAF) of eQTL variants. The data plotted is the MAF of the top variant (lowest P-value) for each gene tested. We observe that the MAF of X Chromosome eQTLs was significantly smaller than the mean MAF of autosomal eQTLs (0.189 versus 0.229; t-test P-value =  $3.8 \times 10^{-7}$ ). **B.** Histogram illustrating the distribution of mean expression levels of genes tested for eQTLs. We observe that the mean expression levels of X Chromosome eQTLs are slightly smaller than the mean expression levels of autosomal eQTLs (t-test P-value =  $2.0 \times 10^{-3}$ ). **C.** Comparison of  $F_{ST}$  estimates for the top cis-eQTLs (FDR 5%) and gene-matched controls on the autosomes and the X Chromosome. Control variants were chosen as variants tested as cis-eQTLs for the same gene as the top cis-eQTL. In addition, each control variant was required to be within 5kb of the top cis-eQTL. We found that the mean difference in  $F_{ST}$  statistics between cis-eQTLs and their matched controls on the X Chromosome was 0.0847 compared to 0.0287 for the autosomes (t-test P-value = 0.0433). **D.** Relationship of eQTL effect size and strength of purifying selection. Boxplots for the effect size of eQTLs on the autosomes ( $n = 11967$ ) and the X Chromosome ( $n = 303$ ) at genes five  $dN/dS$  bins. eQTLs on the X Chromosome have lower effect sizes compared to eQTLs on the autosomes across different  $dN/dS$  bins (one-sided Wilcoxon-rank-sum test; \*\*P value  $< 5 \times 10^{-4}$ ; \* P value  $< 5 \times 10^{-2}$ ).
