# Supplementary material for: Impact of the X Chromosome and sex on regulatory variation
Source: HighWire-hosted journal article supplement (doi:10.1101/gr.197897.115), 2016-04-21
Supplement: Supplemental_Fig_S6.pdf [file Supplemental_Fig_S6.pdf]

## Sex-specific expression

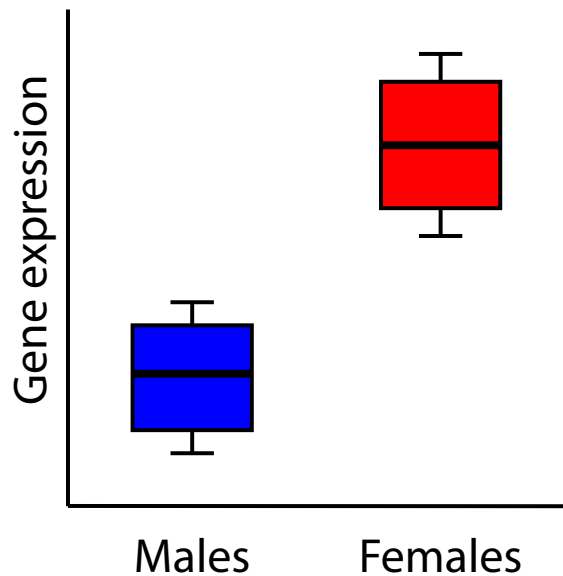

## Sex-specific variance

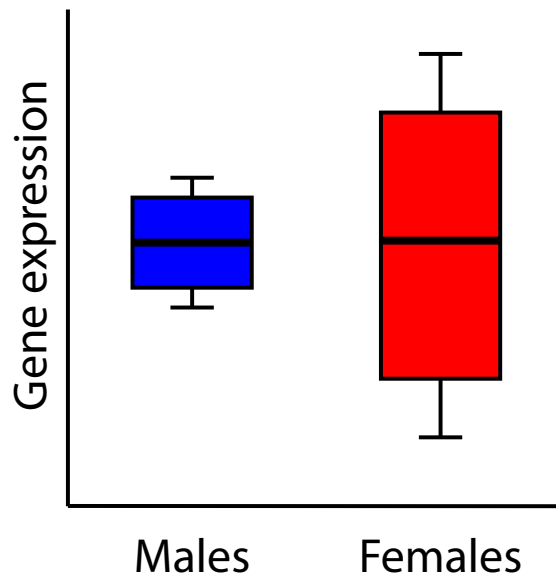

## Sex-interacting eQTL

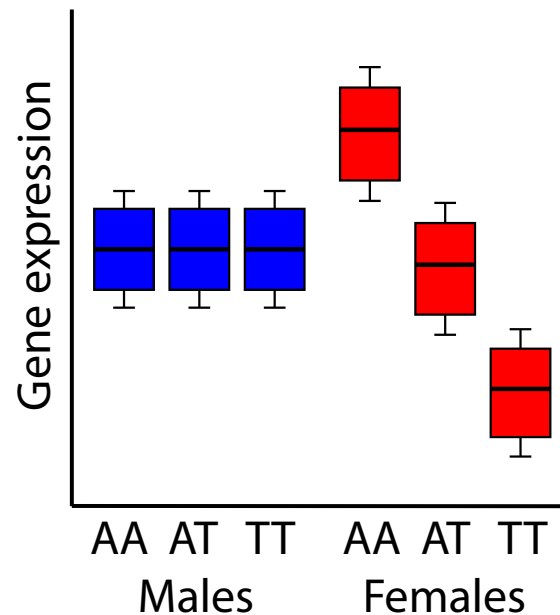

**Figure S6. Conceptual illustration of sex-specific effects evaluated in this study.**

Example of a gene with sex-specific gene expression (left), a gene with sex-specific expression variance (middle), and a gene with a sex-interacting eQTL (right). In the example of sex-specific gene expression, this gene has higher expression in females compared to males. In the example of sex-specific variance, this gene has higher expression variability in females compared to males. In the example of a sex-interacting eQTL, females with different genotypes (AA, AT, and TT) show significant differences in expression, indicating that a genetic effect on expression is present within females but absent in males.
