# Supplementary material for: Impact of the X Chromosome and sex on regulatory variation
Source: HighWire-hosted journal article supplement (doi:10.1101/gr.197897.115), 2016-04-21
Supplement: Supplemental_Fig_S7.pdf [file Supplemental_Fig_S7.pdf]

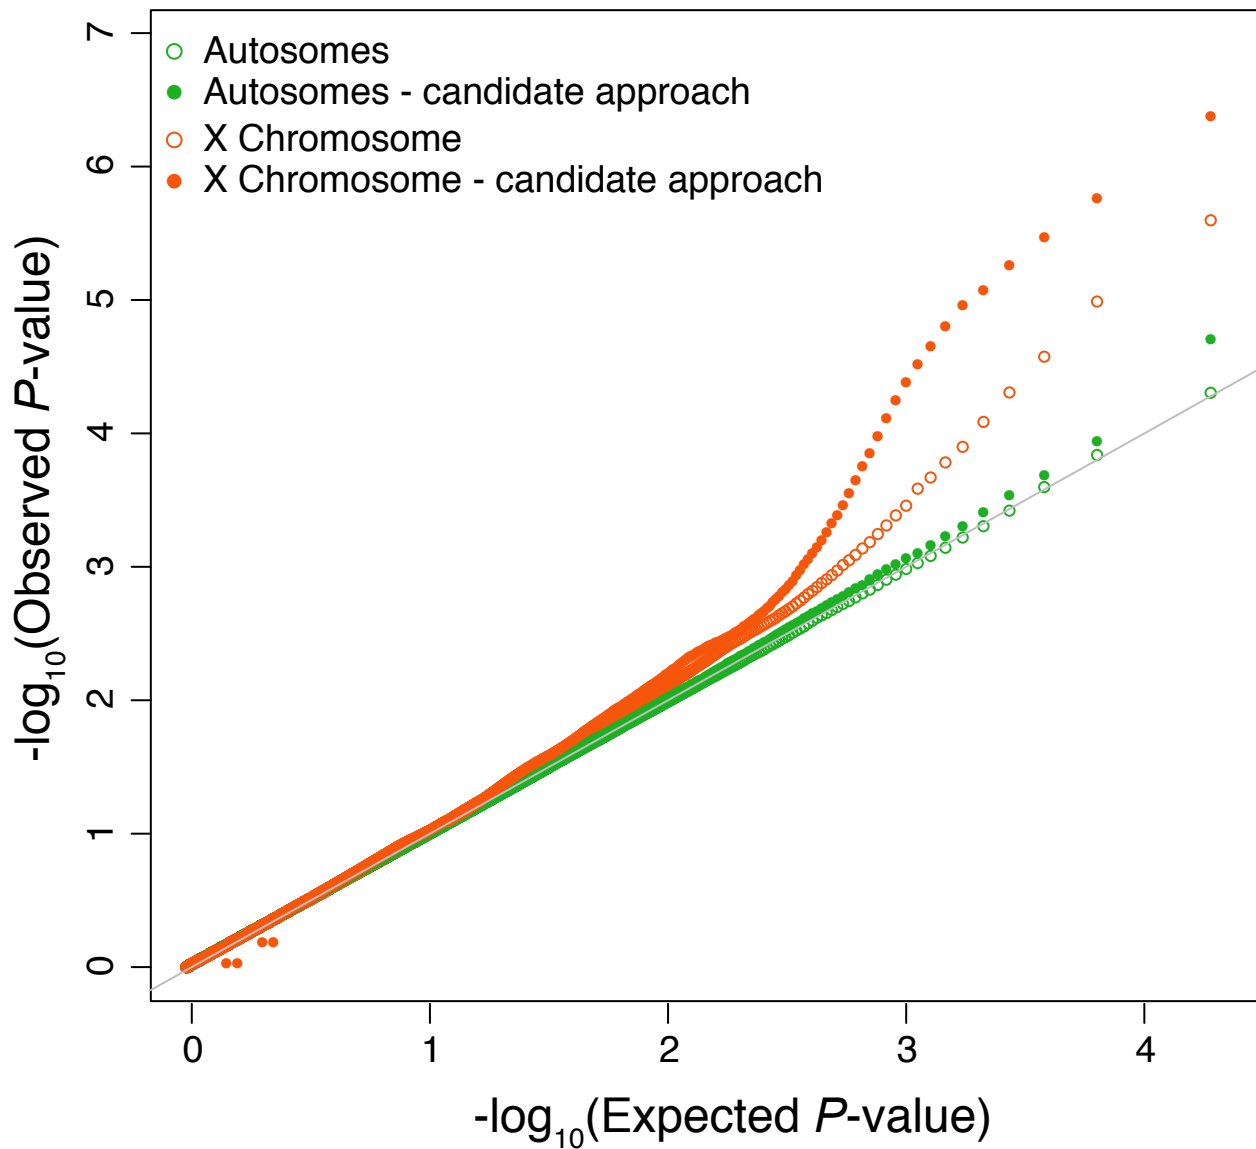

**Figure S7. Comparison of methods for sex-interacting eQTL discovery.**

Quantile-quantile (QQ) plot describing the sex-interacting eQTL association  $P$ -values for SNPs tested within 1MB of genes on the X Chromosome (red) and the autosomes (purple) using two approaches. The naïve approach is indicated by open circles and the conditional approach (see Methods) is indicated by closed circles.
