# Supplementary material for: Impact of the X Chromosome and sex on regulatory variation
Source: HighWire-hosted journal article supplement (doi:10.1101/gr.197897.115), 2016-04-21
Supplement: Supplemental_Fig_S8.pdf [file Supplemental_Fig_S8.pdf]

**A**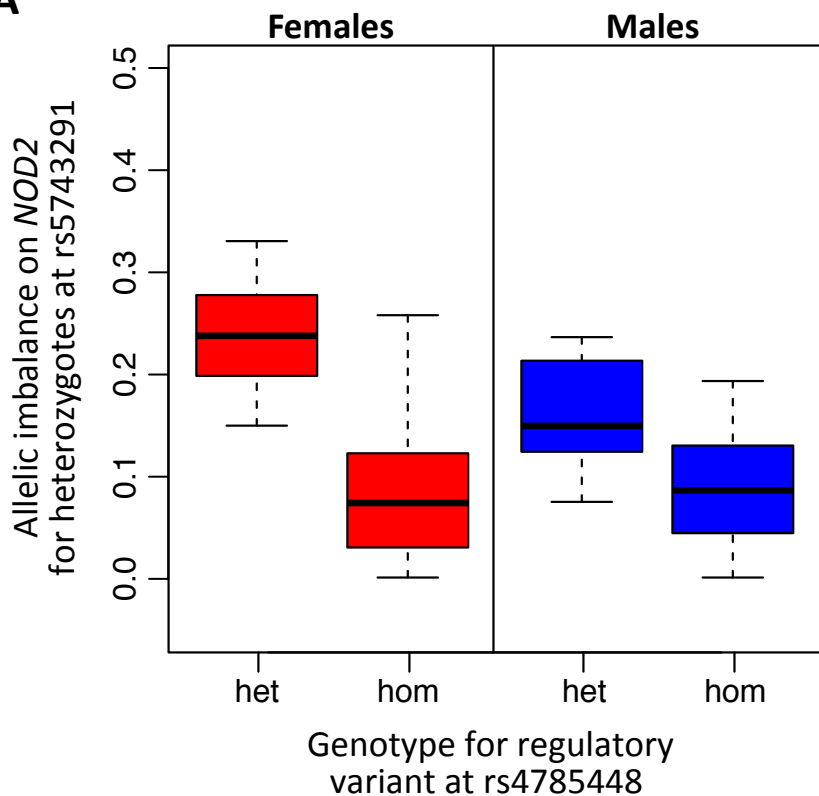**B**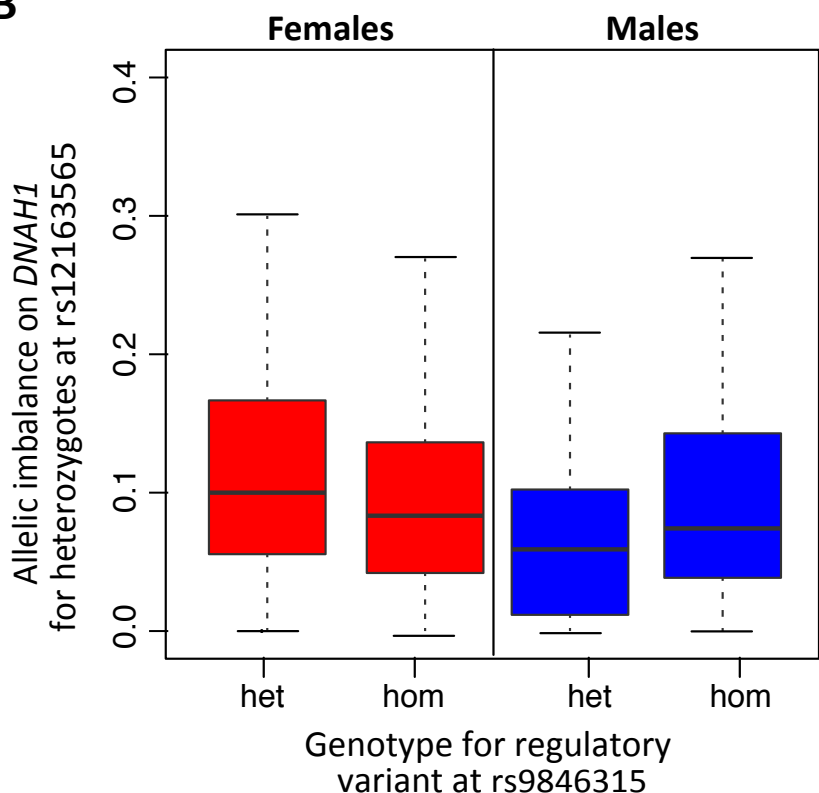

**Figure S8. Sex-interacting allele-specific expression QTL (aseQTL) for *NOD2***

We used a binomial generalized linear mixed model (EAGLE method from Knowles et al., manuscript in preparation) to test for an association between allelic imbalance and sex. **A.** We observed a significant aseQTL with genotype-sex interactions for the regulatory variant at rs4785448 and *NOD2* ( $P$ -value =  $2.5 \times 10^{-3}$ ). In this example, the allelic imbalance is measured as  $|a/n - 0.5|$ , where  $a$  is the alternative allele read count and  $n$  is the reference allele count for heterozygotes at rs5743291. **B.** We also observe a marginally significant aseQTL with genotype-sex interactions for the regulatory variant at rs9846315 and *DNAH1* ( $P$ -value =  $1.0 \times 10^{-1}$ ). In this example, allelic imbalance was measured for heterozygotes at rs12163565.
