# Supplementary material for: Impact of the X Chromosome and sex on regulatory variation
Source: HighWire-hosted journal article supplement (doi:10.1101/gr.197897.115), 2016-04-21
Supplement: Supplemental_Fig_S9.pdf [file Supplemental_Fig_S9.pdf]

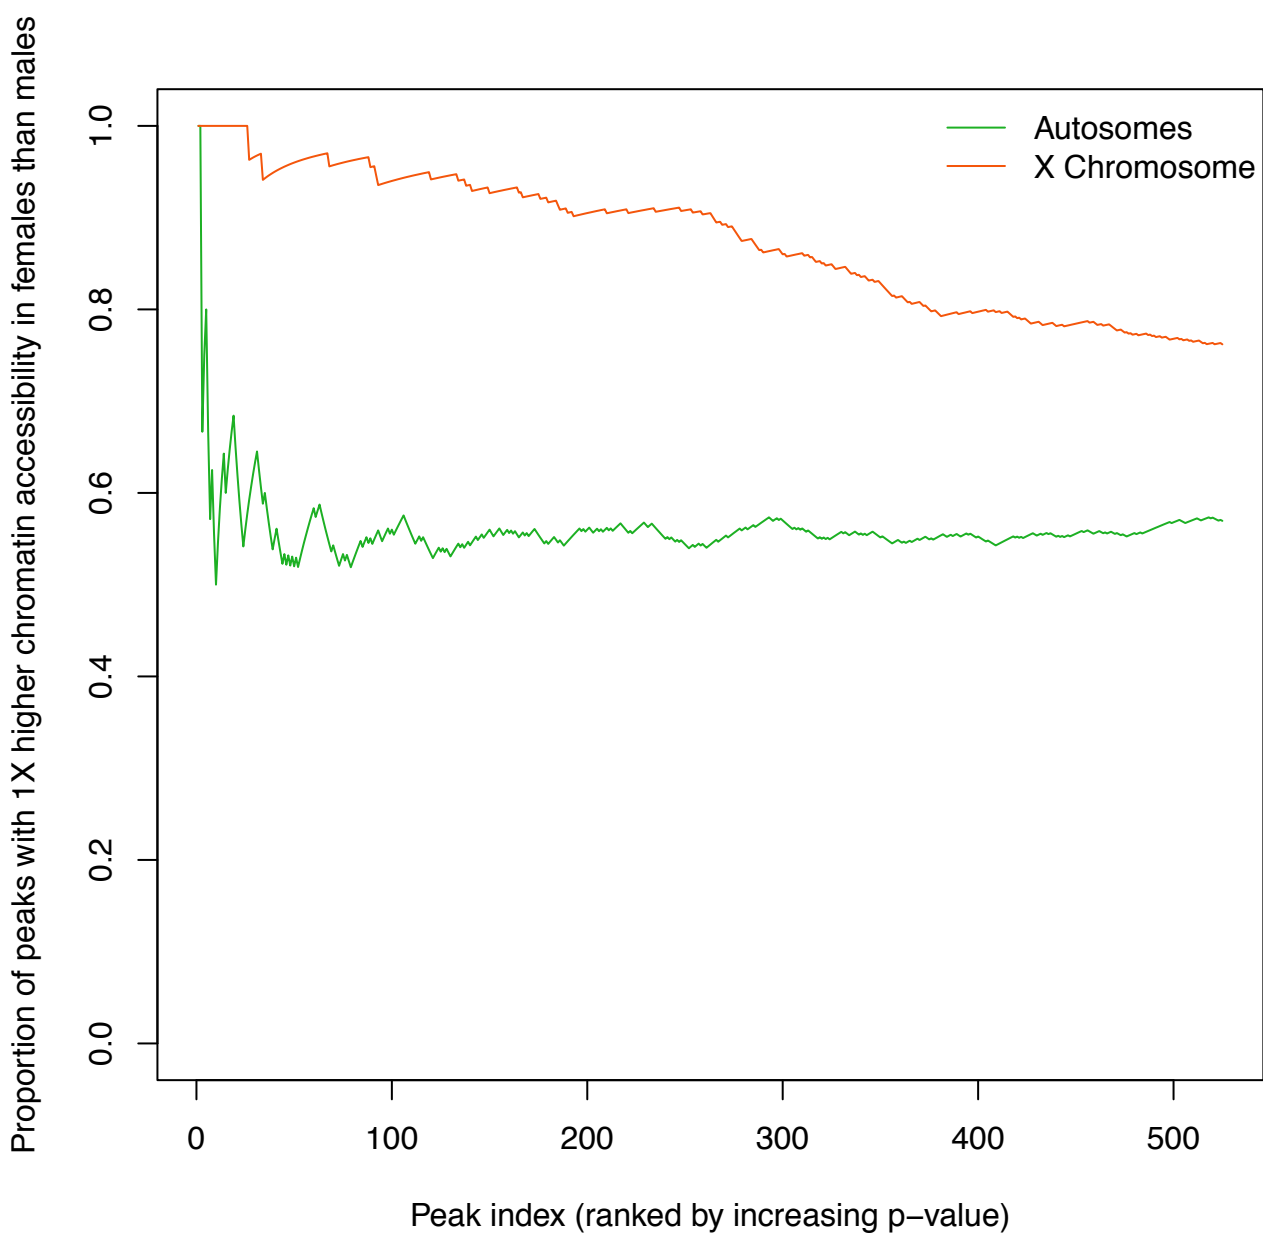

**Figure S9. Comparison of chromatin accessibility levels in males and females on X Chromosome.**

The proportion of regions with higher chromatin accessibility in females for differential chromatin accessibility regions on X Chromosome compared to a matched set of random regions on the autosomes.
