# Supplementary material for: Impact of the X Chromosome and sex on regulatory variation
Source: HighWire-hosted journal article supplement (doi:10.1101/gr.197897.115), 2016-04-21
Supplement: Supplemental_Fig_S13.pdf [file Supplemental_Fig_S13.pdf]

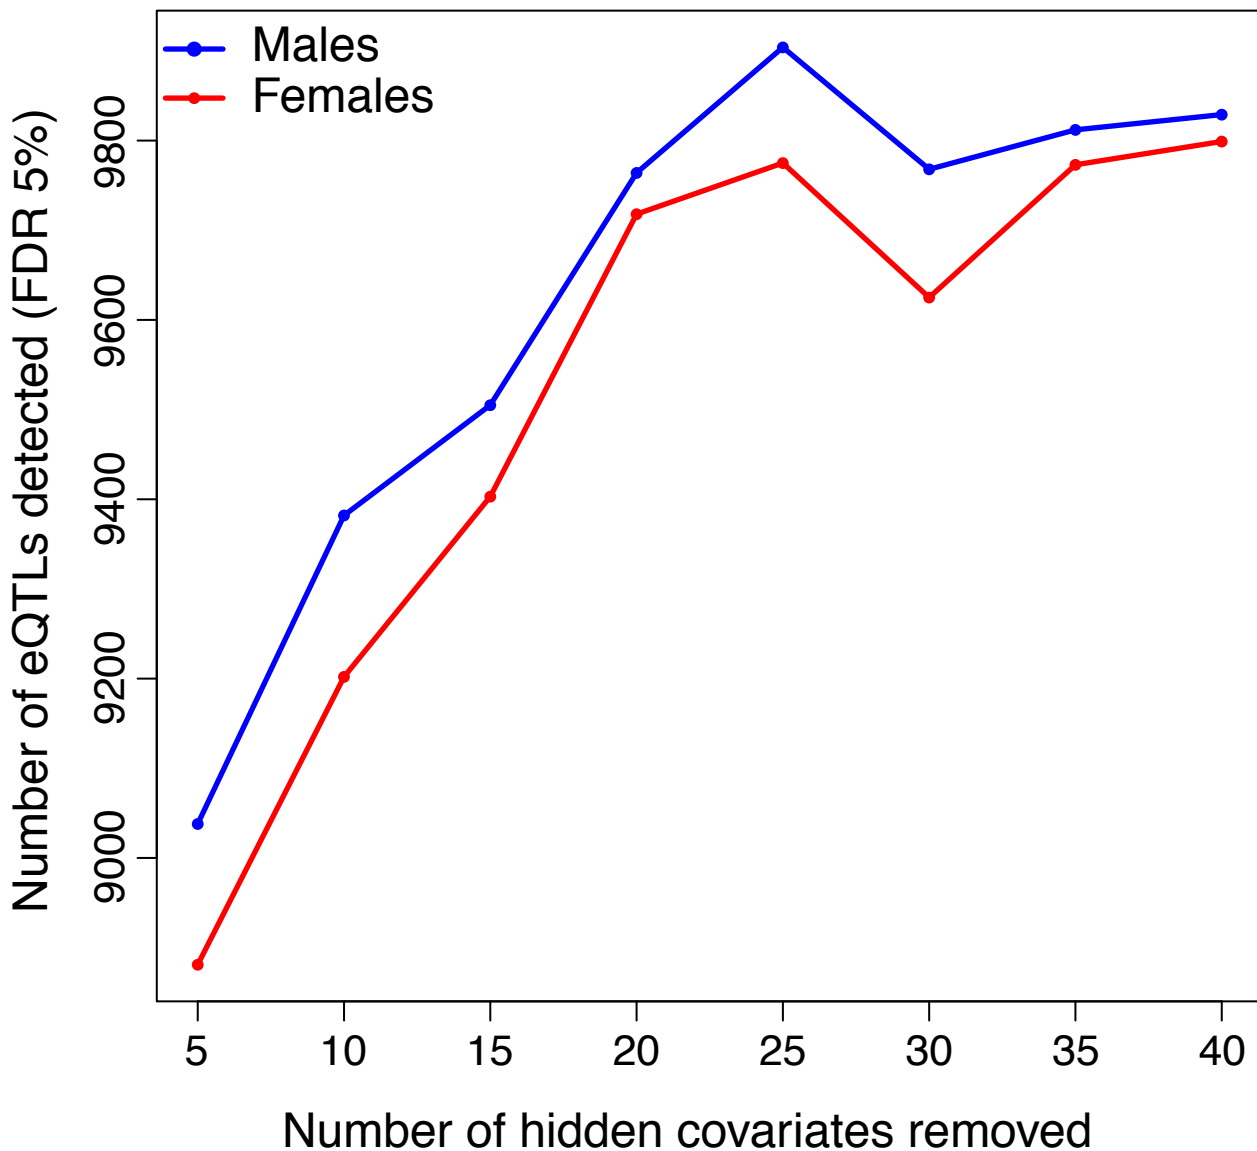

**Figure S13. Removal of hidden covariates from expression data.**

The number eQTLs detected at FDR 5% as a function of the number of hidden covariates removed from the gene expression data. A matched number of males and females ( $n = 274$ ) was used for eQTL detection.

When 25 hidden covariates are removed, eQTL detection is optimized.
