# Supplementary material for: Impact of the X Chromosome and sex on regulatory variation
Source: HighWire-hosted journal article supplement (doi:10.1101/gr.197897.115), 2016-04-21
Supplement: Supplemental_Table_S1.xlsx [file Supplemental_Table_S1.xlsx]

## Sheet: Sheet1
Category	Term	Group Hits	Group Total	Pop Hits	Pop Total	%	P-Value	Fold Enrichment	Fisher Exact
GOTERM_BP_FAT	positive regulation of apoptosis	7	37	255	12669	18.9	4.4e-05	9.4	4.6e-06
GOTERM_BP_FAT	positive regulation of programmed cell death	7	37	258	12669	18.9	4.6e-05	9.3	4.8e-06
GOTERM_BP_FAT	positive regulation of cell death	7	37	258	12669	18.9	4.7e-05	9.3	5e-06
GOTERM_BP_FAT	induction of apoptosis	6	37	194	12669	16.2	0.00014	10.6	1.3e-05
GOTERM_BP_FAT	induction of programmed cell death	6	37	194	12669	16.2	0.00014	10.6	1.3e-05
GOTERM_BP_FAT	regulation of small GTPase mediated signal transduction	5	37	153	12669	13.5	0.00071	11.2	6.2e-05
GOTERM_BP_FAT	induction of apoptosis by extracellular signals	4	37	69	12669	10.8	0.00085	19.8	4.2e-05
GOTERM_BP_FAT	regulation of apoptosis	7	37	461	12669	18.9	0.0011	5.2	0.0002
GOTERM_BP_FAT	regulation of programmed cell death	7	37	461	12669	18.9	0.0011	5.2	0.00021
GOTERM_BP_FAT	regulation of cell death	7	37	470	12669	18.9	0.0012	5.1	0.00022
GOTERM_BP_FAT	apoptosis	6	37	348	12669	16.2	0.0021	5.9	0.00035
GOTERM_BP_FAT	programmed cell death	6	37	354	12669	16.2	0.0022	5.8	0.00037
GOTERM_BP_FAT	membrane organization	5	37	219	12669	13.5	0.0026	7.8	0.00033
GOTERM_BP_FAT	cell death	6	37	411	12669	16.2	0.0043	5	0.00083
GOTERM_BP_FAT	death	6	37	411	12669	16.2	0.0044	5	0.00086
GOTERM_BP_FAT	regulation of Ras protein signal transduction	4	37	126	12669	10.8	0.0047	10.9	0.00042
GOTERM_BP_FAT	regulation of Rho protein signal transduction	3	37	58	12669	8.1	0.011	17.7	0.0006
GOTERM_BP_FAT	mitotic cell cycle	4	37	232	12669	10.8	0.025	5.9	0.0041
GOTERM_BP_FAT	cellular protein localization	4	37	245	12669	10.8	0.029	5.6	0.0049
GOTERM_BP_FAT	cellular macromolecule localization	4	37	249	12669	10.8	0.029	5.5	0.0051
GOTERM_BP_FAT	membrane invagination	3	37	125	12669	8.1	0.047	8.2	0.0055
GOTERM_BP_FAT	endocytosis	3	37	125	12669	8.1	0.047	8.2	0.0055
GOTERM_BP_FAT	actin cytoskeleton organization	3	37	128	12669	8.1	0.048	8	0.0059
GOTERM_BP_FAT	actin filament-based process	3	37	135	12669	8.1	0.053	7.6	0.0068
GOTERM_BP_FAT	vesicle-mediated transport	4	37	334	12669	10.8	0.061	4.1	0.014
GOTERM_BP_FAT	cell cycle process	4	37	342	12669	10.8	0.066	4	0.016
GOTERM_BP_FAT	cell morphogenesis	3	37	174	12669	8.1	0.081	5.9	0.013
GOTERM_BP_FAT	regulation of hydrolase activity	3	37	177	12669	8.1	0.084	5.8	0.014
GOTERM_BP_FAT	cell division	3	37	177	12669	8.1	0.085	5.8	0.014
GOTERM_BP_FAT	cell projection organization	3	37	187	12669	8.1	0.092	5.5	0.016
GOTERM_BP_FAT	cellular component morphogenesis	3	37	194	12669	8.1	0.098	5.3	0.018
GOTERM_BP_FAT	cell cycle	4	37	457	12669	10.8	0.13	3	0.041
GOTERM_BP_FAT	cytoskeleton organization	3	37	245	12669	8.1	0.15	4.2	0.033
GOTERM_BP_FAT	cell cycle phase	3	37	245	12669	8.1	0.15	4.2	0.034
GOTERM_BP_FAT	protein localization	4	37	527	12669	10.8	0.17	2.6	0.06
GOTERM_BP_FAT	proteolysis	4	37	548	12669	10.8	0.18	2.5	0.067
GOTERM_BP_FAT	immune response	3	37	331	12669	8.1	0.23	3.1	0.068
GOTERM_BP_FAT	modification-dependent protein catabolic process	3	37	331	12669	8.1	0.24	3.1	0.072
GOTERM_BP_FAT	modification-dependent macromolecule catabolic process	3	37	331	12669	8.1	0.24	3.1	0.072
GOTERM_BP_FAT	proteolysis involved in cellular protein catabolic process	3	37	354	12669	8.1	0.26	2.9	0.081
GOTERM_BP_FAT	cellular protein catabolic process	3	37	354	12669	8.1	0.26	2.9	0.081
GOTERM_BP_FAT	protein catabolic process	3	37	367	12669	8.1	0.27	2.8	0.087
GOTERM_BP_FAT	intracellular signaling cascade	4	37	685	12669	10.8	0.29	2	0.13
GOTERM_BP_FAT	intracellular transport	3	37	395	12669	8.1	0.29	2.6	0.1
GOTERM_BP_FAT	cellular macromolecule catabolic process	3	37	428	12669	8.1	0.33	2.4	0.12
GOTERM_BP_FAT	macromolecule catabolic process	3	37	467	12669	8.1	0.37	2.2	0.15
GOTERM_BP_FAT	regulation of transcription	4	37	1370	12669	10.8	0.73	1	0.55
Group Hits	Total number of expressed genes with differential variance in GO Category
Group Total	Total number of expressed genes with differential variance
Pop Hits	Total number of expressed genes in GO category
Pop Total	Total number of expressed genes
