# Supplementary material for: Impact of the X Chromosome and sex on regulatory variation
Source: HighWire-hosted journal article supplement (doi:10.1101/gr.197897.115), 2016-04-21
Supplement: Supplemental_Table_S2.xlsx [file Supplemental_Table_S2.xlsx]

## Sheet: Sheet1
	Female Europeans of Geuvadis LCLs (n = 187)			Female Europeans of ImmVar Monocytes (n = 99)
FDR threshold	0.25	0.1	0.05	0.25	0.1	0.05
Proportion of eQTLs on autosomes	0.114767	0.0777492	0.0653528	0.0754389	0.0581553	0.0381543
Proportion of eQTLs on X Chromosome	0.0469208	0.0337243	0.026393	0.0325581	0.0244186	0.0151163
FDR threshold	0.25	0.1	0.05	0.25	0.1	0.05
Number of eQTLs on autosomes	2009	1361	1144	1388	1070	702
Number of eQTLs on X Chromosome	32	23	18	28	21	13
