# Supplementary material for: Impact of the X Chromosome and sex on regulatory variation
Source: HighWire-hosted journal article supplement (doi:10.1101/gr.197897.115), 2016-04-21
Supplement: Supplemental_Table_S3.xlsx [file Supplemental_Table_S3.xlsx]

## Sheet: Sheet1
			Discovery cohort		Replication cohort
			DGN		Framingham	CARTaGENE	ImmVar CD4	ImmVar CD14
Chr	Variant	Gene	P-value	FDR	P-value	P-value	P-value	P-value
5	rs66668391	WDR36	7.6e-11	0.00018	8.15e-10	0.989597	0.8848	0.9981
16	rs4785448	NOD2	5.1e-10	0.0012	NP	0.107436	0.936	0.865
11	chr11:62735958:D	BSCL2	5.5e-10	0.0017	NP	0.00289252	NT	NT
X	rs147067421	MAP7D3	7.7e-09	0.0025	NP	NT	NT	NT
X	chrX:119134201:D	RHOXF1	1.5e-08	0.0061	NP	NT	NT	NT
3	rs9846315	DNAH1	1.1e-08	0.02	NP	0.177936	0.907	0.2113
NP = results were not published in Yao et al 2014
NT = not testable in data set
