# Supplementary material for: Impact of the X Chromosome and sex on regulatory variation
Source: HighWire-hosted journal article supplement (doi:10.1101/gr.197897.115), 2016-04-21
Supplement: Supplemental_Table_S4.xlsx [file Supplemental_Table_S4.xlsx]

## Sheet: Sheet1
Category	Term	Count	%	PValue	Genes	List Total	Pop Hits	Pop Total	Fold Enrichment	Bonferroni	Benjamini	FDR
GOTERM_BP_FAT	GO:0043122~regulation of I-kappaB kinase/NF-kappaB cascade	5	5.15464	0.00661827	CARD8, NOD2, PLEKHG5, TLR4, CC2D1A	70	101	9294	6.57284	0.998825	0.998825	9.97894
GOTERM_BP_FAT	GO:0008406~gonad development	4	4.12371	0.0108375	CCND2, EIF2B2, FANCA, FNDC3A	70	62	9294	8.5659	0.999984	0.996056	15.8452
GOTERM_BP_FAT	GO:0048608~reproductive structure development	4	4.12371	0.0139159	CCND2, EIF2B2, FANCA, FNDC3A	70	68	9294	7.81008	0.999999	0.991313	19.8972
GOTERM_BP_FAT	GO:0045137~development of primary sexual characteristics	4	4.12371	0.0150414	CCND2, EIF2B2, FANCA, FNDC3A	70	70	9294	7.58694	1	0.97871	21.3325
GOTERM_BP_FAT	GO:0043627~response to estrogen stimulus	4	4.12371	0.0168238	TXNIP, CYP11A1, CCND2, CRIPAK	70	73	9294	7.27515	1	0.96818	23.5562
GOTERM_BP_FAT	GO:0006979~response to oxidative stress	5	5.15464	0.0173556	TXNIP, NUDT1, CYP11A1, MPO, TLR4	70	134	9294	4.95416	1	0.948423	24.2083
GOTERM_BP_FAT	GO:0010033~response to organic substance	10	10.3093	0.0193783	TXNIP, NOD2, PFKL, CYP11A1, CCND2, EPHX1, CRIPAK, TLR4, EIF2B2, NUDC	70	548	9294	2.42284	1	0.941588	26.6408
GOTERM_BP_FAT	GO:0010627~regulation of protein kinase cascade	6	6.18557	0.0196141	CARD8, NOD2, PLEKHG5, HGS, TLR4, CC2D1A	70	210	9294	3.79347	1	0.919197	26.9196
GOTERM_BP_FAT	GO:0032102~negative regulation of response to external stimulus	3	3.09278	0.0219895	CLN3, NPC1, IL2RA	70	31	9294	12.8488	1	0.918738	29.6731
GOTERM_BP_FAT	GO:0016242~negative regulation of macroautophagy	2	2.06186	0.0221099	CLN3, NPC1	70	3	9294	88.5143	1	0.89685	29.8099
GOTERM_BP_FAT	GO:0010507~negative regulation of autophagy	2	2.06186	0.0221099	CLN3, NPC1	70	3	9294	88.5143	1	0.89685	29.8099
GOTERM_BP_FAT	GO:0042981~regulation of apoptosis	11	11.3402	0.0225948	TXNIP, CLN3, PROK2, CARD8, NOD2, CDKN1B, IL2RA, AEN, PLEKHG5, MPO, TLR4	70	658	9294	2.21958	1	0.878868	30.359
GOTERM_BP_FAT	GO:0043067~regulation of programmed cell death	11	11.3402	0.0236757	TXNIP, CLN3, PROK2, CARD8, NOD2, CDKN1B, IL2RA, AEN, PLEKHG5, MPO, TLR4	70	663	9294	2.20284	1	0.868487	31.5683
GOTERM_BP_FAT	GO:0010941~regulation of cell death	11	11.3402	0.0243421	TXNIP, CLN3, PROK2, CARD8, NOD2, CDKN1B, IL2RA, AEN, PLEKHG5, MPO, TLR4	70	666	9294	2.19292	1	0.854266	32.3041
GOTERM_BP_FAT	GO:0007548~sex differentiation	4	4.12371	0.0250936	CCND2, EIF2B2, FANCA, FNDC3A	70	85	9294	6.24807	1	0.841866	33.1249
GOTERM_BP_FAT	GO:0080135~regulation of cellular response to stress	4	4.12371	0.0258654	CLN3, NOD2, NPC1, TLR4	70	86	9294	6.17542	1	0.830517	33.9581
GOTERM_BP_FAT	GO:0009749~response to glucose stimulus	3	3.09278	0.0261547	TXNIP, PFKL, EIF2B2	70	34	9294	11.7151	1	0.81417	34.2679
GOTERM_BP_FAT	GO:0009746~response to hexose stimulus	3	3.09278	0.0276087	TXNIP, PFKL, EIF2B2	70	35	9294	11.3804	1	0.812361	35.8047
GOTERM_BP_FAT	GO:0034284~response to monosaccharide stimulus	3	3.09278	0.0276087	TXNIP, PFKL, EIF2B2	70	35	9294	11.3804	1	0.812361	35.8047
GOTERM_BP_FAT	GO:0008219~cell death	10	10.3093	0.0290097	IGHMBP2, CLN3, SEMA6A, ATXN3, CARD8, CDKN1B, IL2RA, AEN, PLEKHG5, BSCL2	70	588	9294	2.25802	1	0.810176	37.2534
GOTERM_BP_FAT	GO:0008585~female gonad development	3	3.09278	0.0290947	CCND2, EIF2B2, FANCA	70	36	9294	11.0643	1	0.793795	37.3403
GOTERM_BP_FAT	GO:0070374~positive regulation of ERK1 and ERK2 cascade	2	2.06186	0.0293722	NOD2, TLR4	70	4	9294	66.3857	1	0.780073	37.6232
GOTERM_BP_FAT	GO:0032490~detection of molecule of bacterial origin	2	2.06186	0.0293722	NOD2, TLR4	70	4	9294	66.3857	1	0.780073	37.6232
GOTERM_BP_FAT	GO:0070372~regulation of ERK1 and ERK2 cascade	2	2.06186	0.0293722	NOD2, TLR4	70	4	9294	66.3857	1	0.780073	37.6232
GOTERM_BP_FAT	GO:0016241~regulation of macroautophagy	2	2.06186	0.0293722	CLN3, NPC1	70	4	9294	66.3857	1	0.780073	37.6232
GOTERM_BP_FAT	GO:0043123~positive regulation of I-kappaB kinase/NF-kappaB cascade	4	4.12371	0.0299149	NOD2, PLEKHG5, TLR4, CC2D1A	70	91	9294	5.83611	1	0.769937	38.1731
GOTERM_BP_FAT	GO:0016265~death	10	10.3093	0.0301313	IGHMBP2, CLN3, SEMA6A, ATXN3, CARD8, CDKN1B, IL2RA, AEN, PLEKHG5, BSCL2	70	592	9294	2.24276	1	0.756567	38.3911
GOTERM_BP_FAT	GO:0010035~response to inorganic substance	5	5.15464	0.0308246	TXNIP, NPC1, CYP11A1, MPO, CAPN3	70	160	9294	4.14911	1	0.749193	39.0846
GOTERM_BP_FAT	GO:0046660~female sex differentiation	3	3.09278	0.0321604	CCND2, EIF2B2, FANCA	70	38	9294	10.482	1	0.749383	40.4003
GOTERM_BP_FAT	GO:0046545~development of primary female sexual characteristics	3	3.09278	0.0321604	CCND2, EIF2B2, FANCA	70	38	9294	10.482	1	0.749383	40.4003
GOTERM_BP_FAT	GO:0050678~regulation of epithelial cell proliferation	3	3.09278	0.033739	CDKN1B, CCND2, FOXP1	70	39	9294	10.2132	1	0.752122	41.9208
GOTERM_BP_FAT	GO:0010038~response to metal ion	4	4.12371	0.0361146	TXNIP, NPC1, CYP11A1, CAPN3	70	98	9294	5.41924	1	0.762447	44.1407
GOTERM_BP_FAT	GO:0032108~negative regulation of response to nutrient levels	2	2.06186	0.0365814	CLN3, NPC1	70	5	9294	53.1086	1	0.753983	44.5674
GOTERM_BP_FAT	GO:0032105~negative regulation of response to extracellular stimulus	2	2.06186	0.0365814	CLN3, NPC1	70	5	9294	53.1086	1	0.753983	44.5674
GOTERM_BP_FAT	GO:0010506~regulation of autophagy	2	2.06186	0.0365814	CLN3, NPC1	70	5	9294	53.1086	1	0.753983	44.5674
GOTERM_BP_FAT	GO:0009743~response to carbohydrate stimulus	3	3.09278	0.0386516	TXNIP, PFKL, EIF2B2	70	42	9294	9.48367	1	0.760769	46.4235
GOTERM_BP_FAT	GO:0032101~regulation of response to external stimulus	4	4.12371	0.0439472	CLN3, NPC1, IL2RA, TLR4	70	106	9294	5.01024	1	0.792894	50.9097
GOTERM_BP_FAT	GO:0042542~response to hydrogen peroxide	3	3.09278	0.0455955	TXNIP, CYP11A1, MPO	70	46	9294	8.65901	1	0.794123	52.2326
GOTERM_BP_FAT	GO:0010648~negative regulation of cell communication	5	5.15464	0.0459899	CLN3, CARD8, NOD2, NPC1, HGS	70	182	9294	3.64757	1	0.78627	52.5442
